# Supplementary material for: Differential Roles of Cystathionine Gamma-Lyase and Mercaptopyruvate Sulfurtransferase in Hapten-Induced Colitis and Contact Dermatitis in Mice
Source: MDPI journal article supplement (doi:10.3390/ijms24032659), 2023-01-31
Supplement: s1 [file s1]

## Supplementary Data

### Differential Roles of Cystathionine Gamma-Lyase and Mercaptopyruvate Sulfurtransferase in Hapten-Induced Colitis and Contact Dermatitis in Mice

Noriyuki Akahoshi, Ryoka Hasegawa, Shingo Yamamoto, Rintaro Takemoto, Toshiki Yoshizawa, Waka Kamichatani and Isao Ishii\*

Department of Health Chemistry, Showa Pharmaceutical University, Machida,  
Tokyo 194-8543, Japan

\* Correspondence: i-ishii@ac.shoyaku.ac.jp ; Tel.: +81-42-721-1563

Supplementary Table 1: Primer sets for quantitative RT-PCR.

Supplementary Figure 1: Hematoxylin/eosin-stained colon sagittal sections of TNBS-induced colitis in wild-type (WT), CTH-deficient (*Cth*<sup>-/-</sup>), and MPST-deficient (*Mpst*<sup>-/-</sup>) mice.

Supplementary Figure 2: Hematoxylin/eosin-stained colon sagittal sections of oxazolone-induced colitis in wild-type (WT), CTH-deficient (*Cth*<sup>-/-</sup>), and MPST-deficient (*Mpst*<sup>-/-</sup>) mice.

Supplementary Figure 3: Expression levels of various cytokine mRNAs in the ear during trinitrochlorobenzene (TNCB)-induced contact dermatitis at 2 h after the challenge. Levels of IL-1 $\beta$  (A), IL-6 (B), TNA $\alpha$  (C), IFN $\gamma$  (D), IL-2 (E), IL-4 (F), TGF $\beta$  (G), IL-17 (H), and IL-10 (I) mRNA levels were normalized by the housekeeping HPRT1 mRNA levels and the relative expression *versus* vehicle-treated wild-type samples were calculated. Data are the mean  $\pm$  SD with sample numbers in parentheses. Differences are significant by a one-way ANOVA with Tukey's multiple comparison test at \* $p$ <0.05, \*\* $p$ <0.01, and \*\*\* $p$ <0.001 *versus* vehicle-treated samples of each genotype.

**Supplementary Table 1** Primer sets for quantitative RT-PCR

| Gene                         |         | Sequence (5'-3')                | Amplicon size (base pair) |
|------------------------------|---------|---------------------------------|---------------------------|
| <i>Cth</i>                   | Forward | 5'-TGGTGCTGCCCCATTTCGTTG-3'     | 265                       |
|                              | Reverse | 5'-GCCACCCTCCTGAAGTACCT-3'      |                           |
| <i>Hprt1</i>                 | Forward | 5'-ATTGTGGCCCTCTGTGTGCT-3'      | 165                       |
|                              | Reverse | 5'-AACTTTTATGTCCCCCGTTGACT-3'   |                           |
| <i>Ifng</i>                  | Forward | 5'-TGGCTTTGCAGCTCTTCCTC-3'      | 157                       |
|                              | Reverse | 5'-TCCTTTTGCCAGTTCCTCCA-3'      |                           |
| <i>Il1<math>\beta</math></i> | Forward | 5'-AGCACCTTCTTTTCCTTCATCTTG-3'  | 148                       |
|                              | Reverse | 5'-CCGACAGCACGAGGCTTTTT-3'      |                           |
| <i>Il2</i>                   | Forward | 5'-CTGCGGCATGTTCTGGATTT-3'      | 125                       |
|                              | Reverse | 5'-TGGCACTCAAATGTGTTGTCAG-3'    |                           |
| <i>Il4</i>                   | Forward | 5'-CATCGGCATTTTGAACGAGGTCA-3'   | 240                       |
|                              | Reverse | 5'-CTTATCGATGAATCCAGGCATCG-3'   |                           |
| <i>Il6</i>                   | Forward | 5'-CCACTTCACAAGTCGGAGGCTTA-3'   | 169                       |
|                              | Reverse | 5'-CCAGTTTGGTAGCATCCATCATT-3'   |                           |
| <i>Il10</i>                  | Forward | 5'-AAGACAATAACTGCACCCACTTCC-3'  | 164                       |
|                              | Reverse | 5'-GCAACCCAAGTAACCCTTAAAGTCC-3' |                           |
| <i>Il17</i>                  | Forward | 5'-GGCCCTCAGACTACCTCAACC-3'     | 131                       |
|                              | Reverse | 5'-CTTTCCCTCCGCATTGACAC-3'      |                           |
| <i>Mpst</i>                  | Forward | 5'-CATCAAGACCCACGAGGACA-3'      | 188                       |
|                              | Reverse | 5'-TCTTCTCCAGGCCTTCGTTG-3'      |                           |
| <i>Tgfb</i>                  | Forward | 5'-ACATCACACGGGACCAAACC-3'      | 154                       |
|                              | Reverse | 5'-AGGCACAGGGTCATCATCAA-3'      |                           |
| <i>Tnfa</i>                  | Forward | 5'-GCCTCTTCTCATTCCTGCTTGT-3'    | 147                       |
|                              | Reverse | 5'-ATGATCTGAGTGTGAGGGTCTGG-3'   |                           |

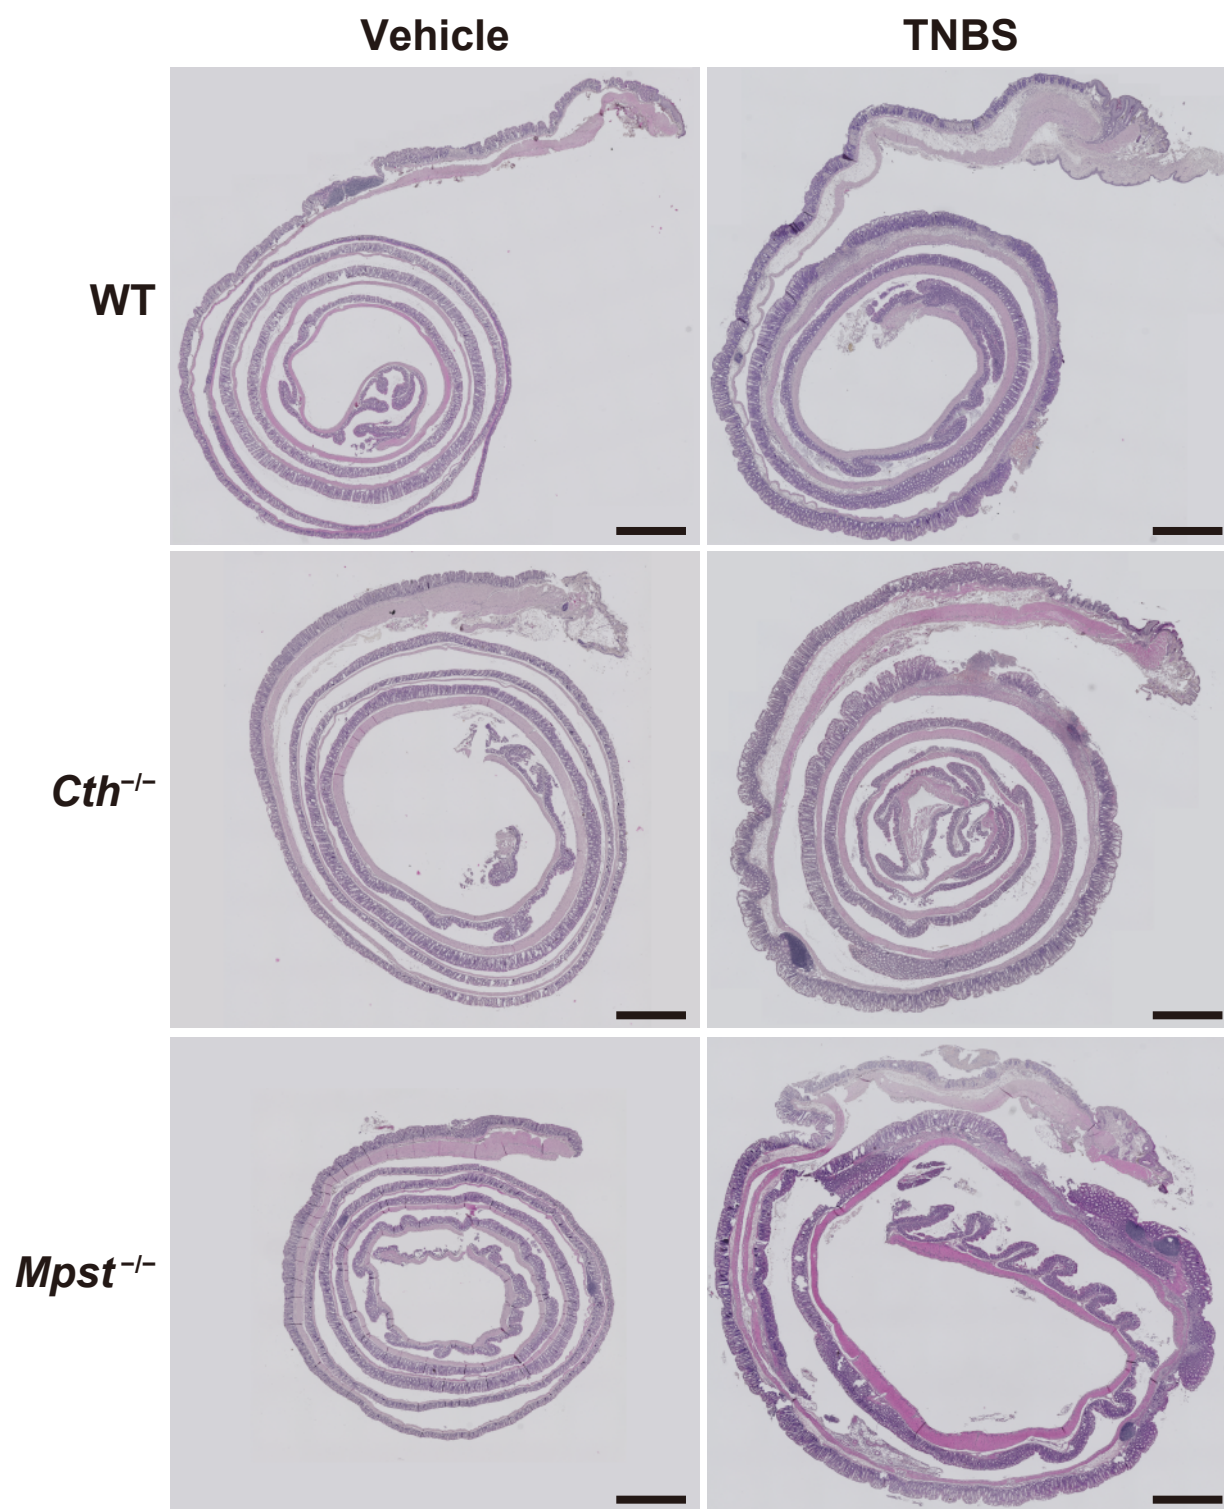

Supplementary Figure 1. Hematoxylin/eosin-stained colon sagittal sections of TNBS-induced colitis in wild-type (WT), CTH-deficient (*Cth*<sup>-/-</sup>), and MPST-deficient (*Mpst*<sup>-/-</sup>) mice. Bars indicate 1 mm.

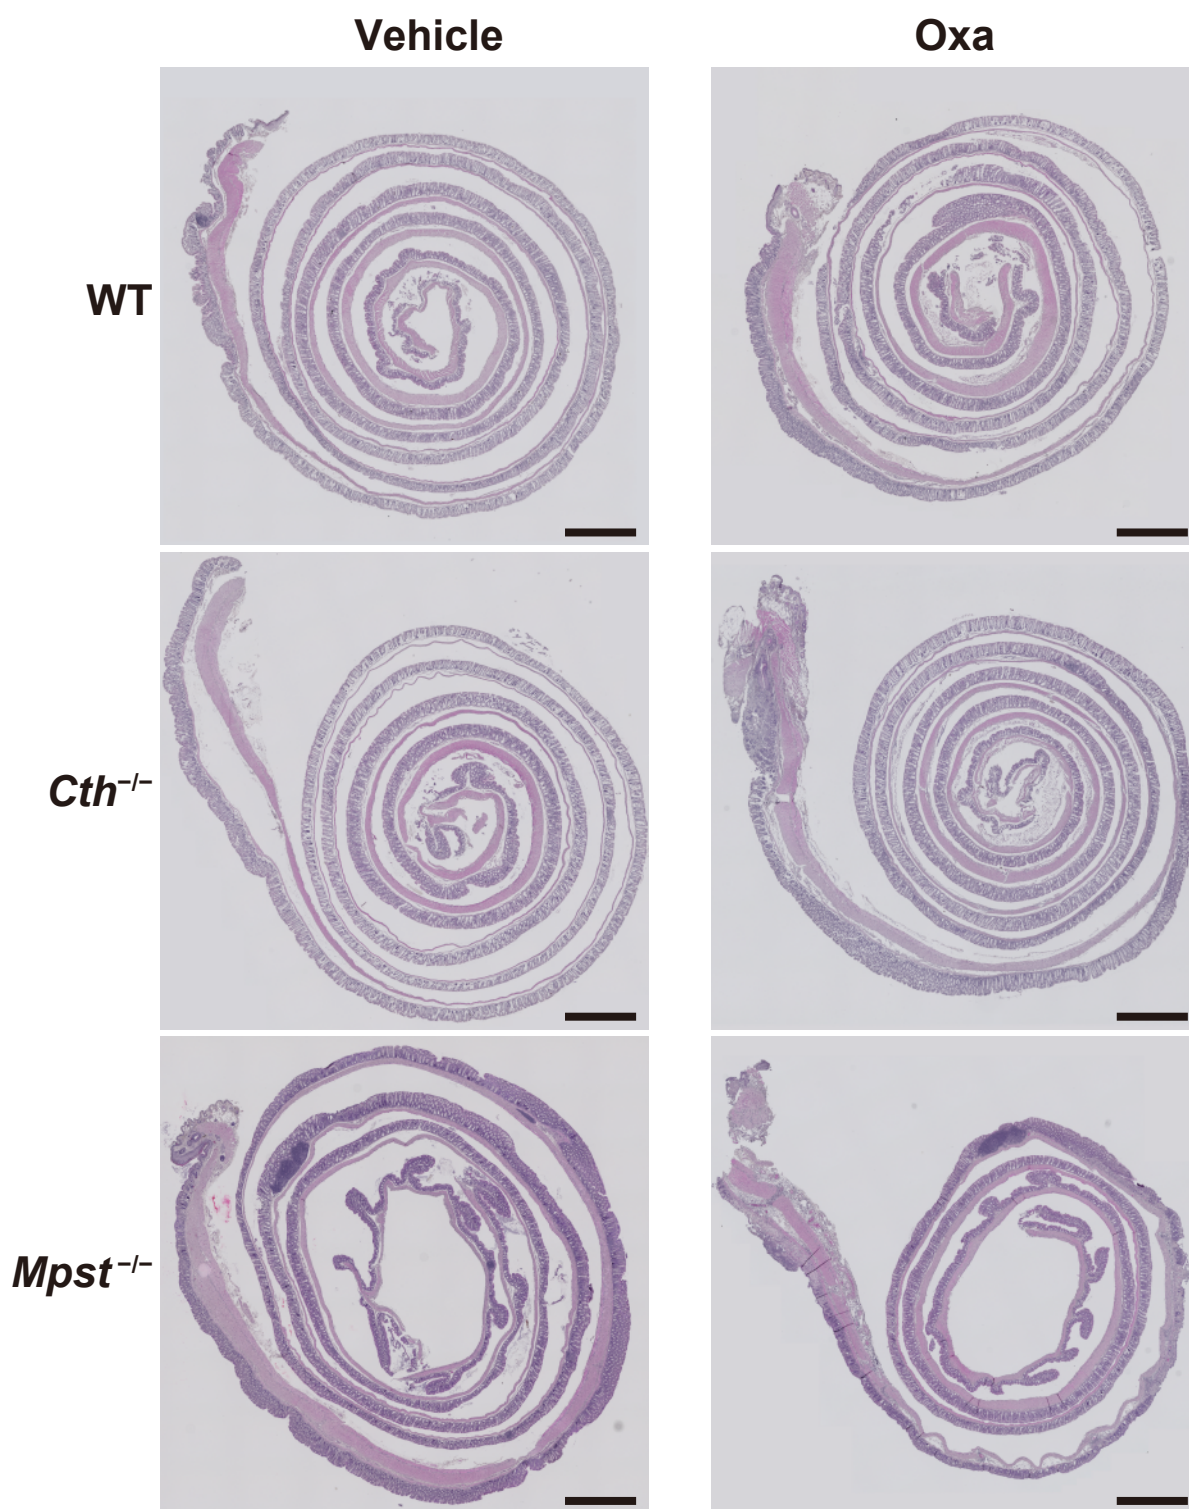

Supplementary Figure 2. Hematoxylin/eosin-stained colon sagittal sections of oxazolone-induced colitis in wild-type (WT), CTH-deficient (*Cth*<sup>-/-</sup>), and MPST-deficient (*Mpst*<sup>-/-</sup>) mice. Bars indicate 1 mm.

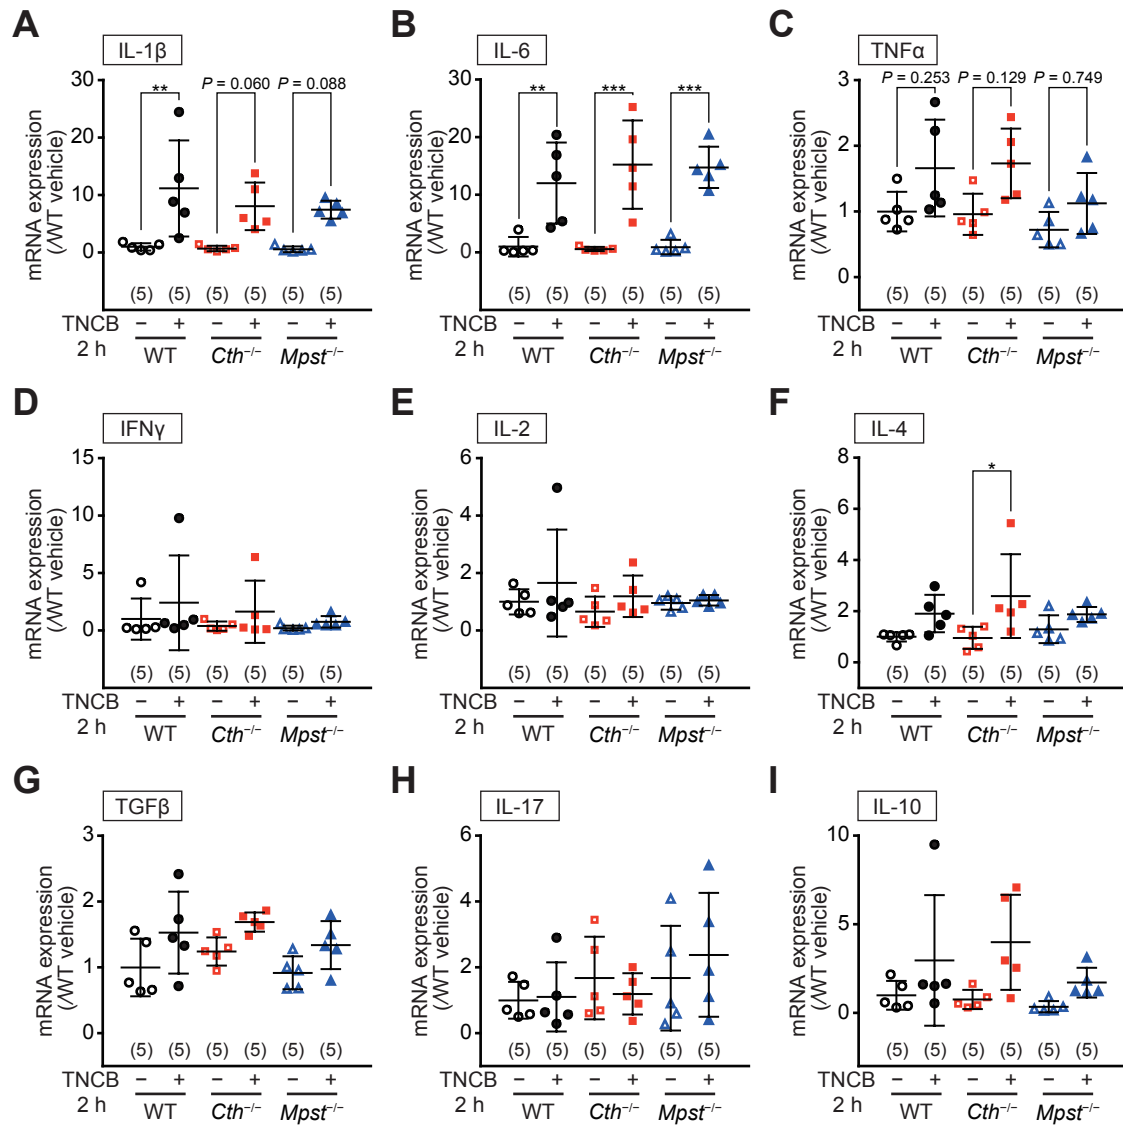

Supplementary Figure 3. Expression levels of various cytokine mRNAs in the ear during trinitrochlorobenzene (TNCB)-induced contact dermatitis at 2 h after the challenge. IL-1 $\beta$  (A), IL-6 (B), TNF $\alpha$  (C), IFN $\gamma$  (D), IL-2 (E), IL-4 (F), TGF $\beta$  (G), IL-17 (H), and IL-10 (I) mRNA levels were normalized by the housekeeping HPRT1 mRNA levels and the relative expression *versus* vehicle-treated wild-type samples were calculated. Data are the mean  $\pm$  SD with sample numbers in parentheses. Differences are significant by a one-way ANOVA with Tukey' s multiple comparison test at \* $p$ <0.05, \*\* $p$ <0.01, and \*\*\* $p$ <0.001 *versus* vehicle-treated samples of each genotype.
